# Supplementary material for: Synthesis of {010}-faceted anatase TiO2nanoparticles from layered titanate for dye-sensitized solar cells
Source: Royal Society of Chemistry journal article supplement (doi:10.1039/c4ce01250j), 2014-07-30
Supplement: c4ce01250j1.pdf [file c4ce01250j1.pdf]

Electronic Supplementary Information

Synthesis of {010}-Faceted Anatase TiO<sub>2</sub>  
Nanoparticles from Layered Titanate for  
Dye-sensitized Solar Cells

Changdong Chen, Galhenage A. Sewvandi, Takafumi Kusunose, Yasuhiro Tanaka, Shunsuke Nakanishi, and Qi Feng\*

Department of Advanced Materials Science, Faculty of Engineering, Kagawa University,

2217-20 Hayashi-cho, Takamatsu 761-0396, Japan

\*E-mail: [feng@eng.kagawa-u.ac.jp](mailto:feng@eng.kagawa-u.ac.jp).

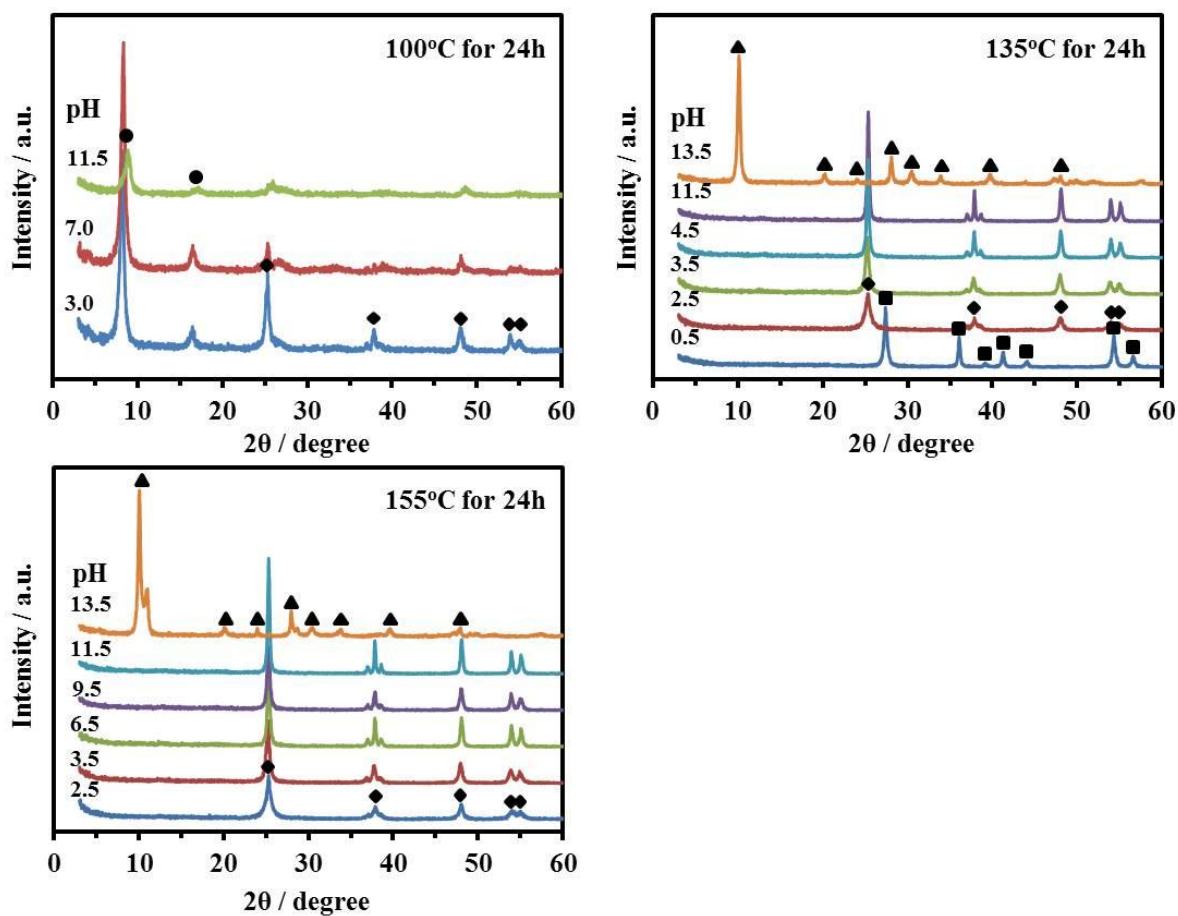

**Figure S1.** XRD patterns of products obtained by hydrothermal treatment of PA-HTO nanosheet solutions at 100°C, 135°C and 155°C for 24h, respectively. ●: PA-HTO phase; ■: rutile phase; ◆: anatase phase and ▲: K-HTO phase.

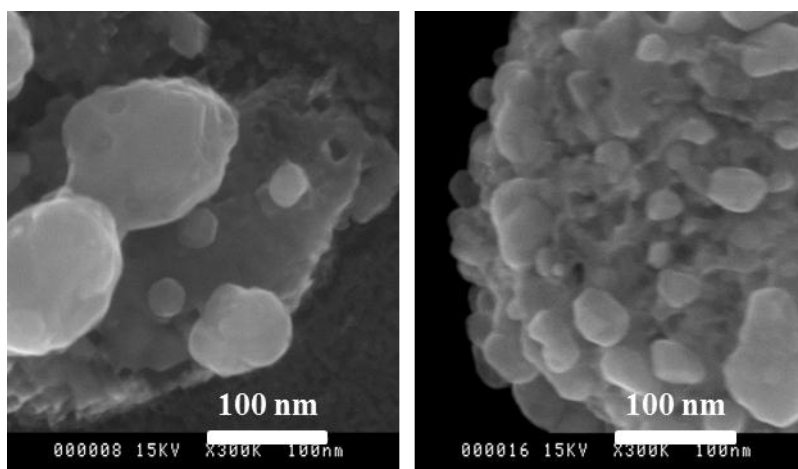

**Figure S2.** FE-SEM images of PA-135-0.5 samples. This sample is single rutile phase.

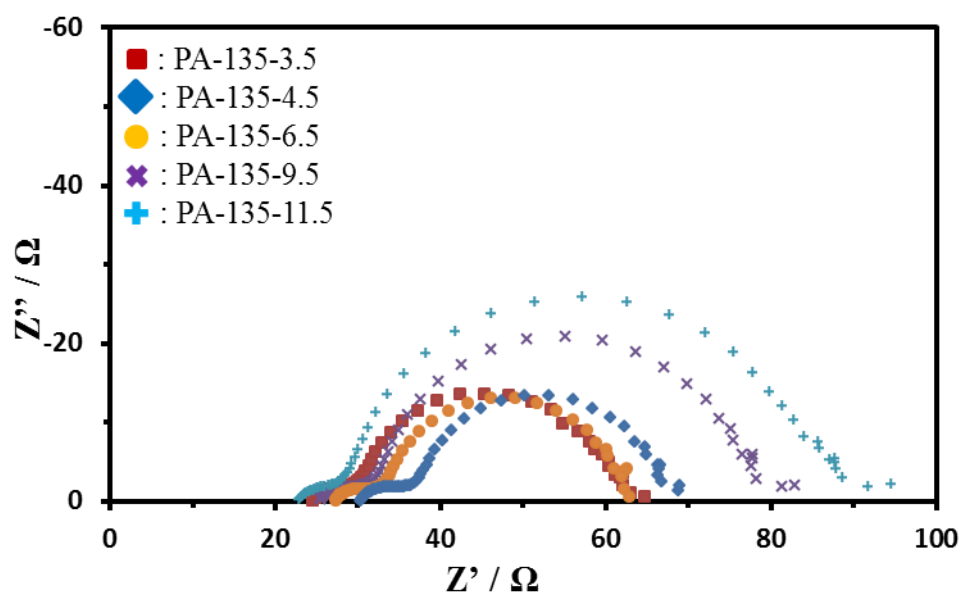

**Figure S3.** Electrochemical impedance spectrum of DSSCs prepared using the products obtained by hydrothermal treatment of PA-HTO nanosheet solution at 135°C for 24h.

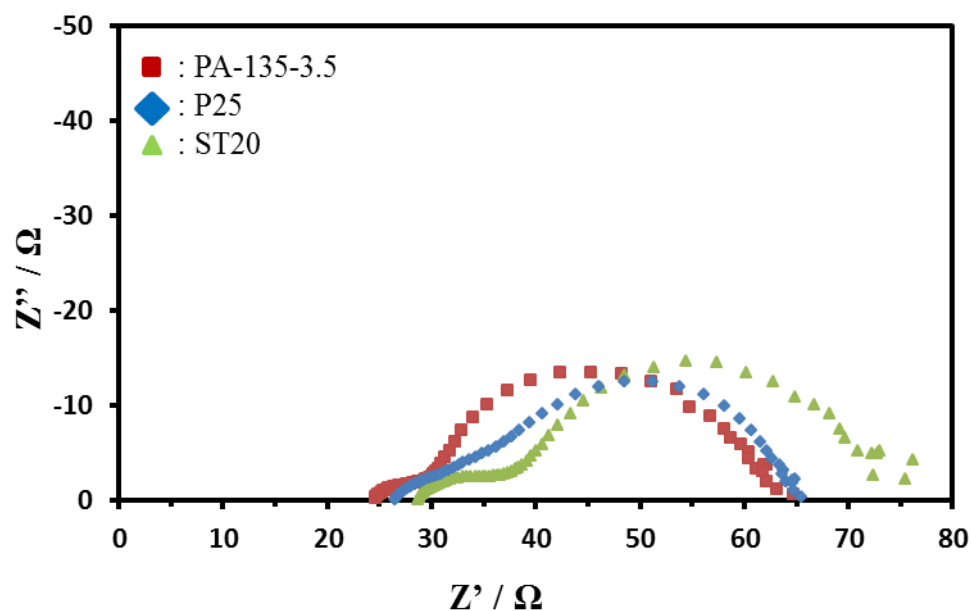

**Figure S4.** Electrochemical impedance spectra of DSSCs fabricated using PA-135-3.5, P25 and ST20 samples.
